# Supplementary material for: NMDA receptor-targeted enrichment of CaMKIIα improves fear memory
Source: PubMed Central journal article supplement — iScience. 2022 Aug 2;25(8):104864. doi: 10.1016/j.isci.2022.104864 (PMC9391594; doi:10.1016/j.isci.2022.104864), 2022-08-02
Supplement: mmc1.pdf [file mmc1.pdf]

iScience, Volume 25

## **Supplemental information**

**NMDA receptor-targeted**

**enrichment of CaMKII $\alpha$**

**improves fear memory**

**Anthony Chifor, Jeongyoon Choi, and Joongkyu Park**

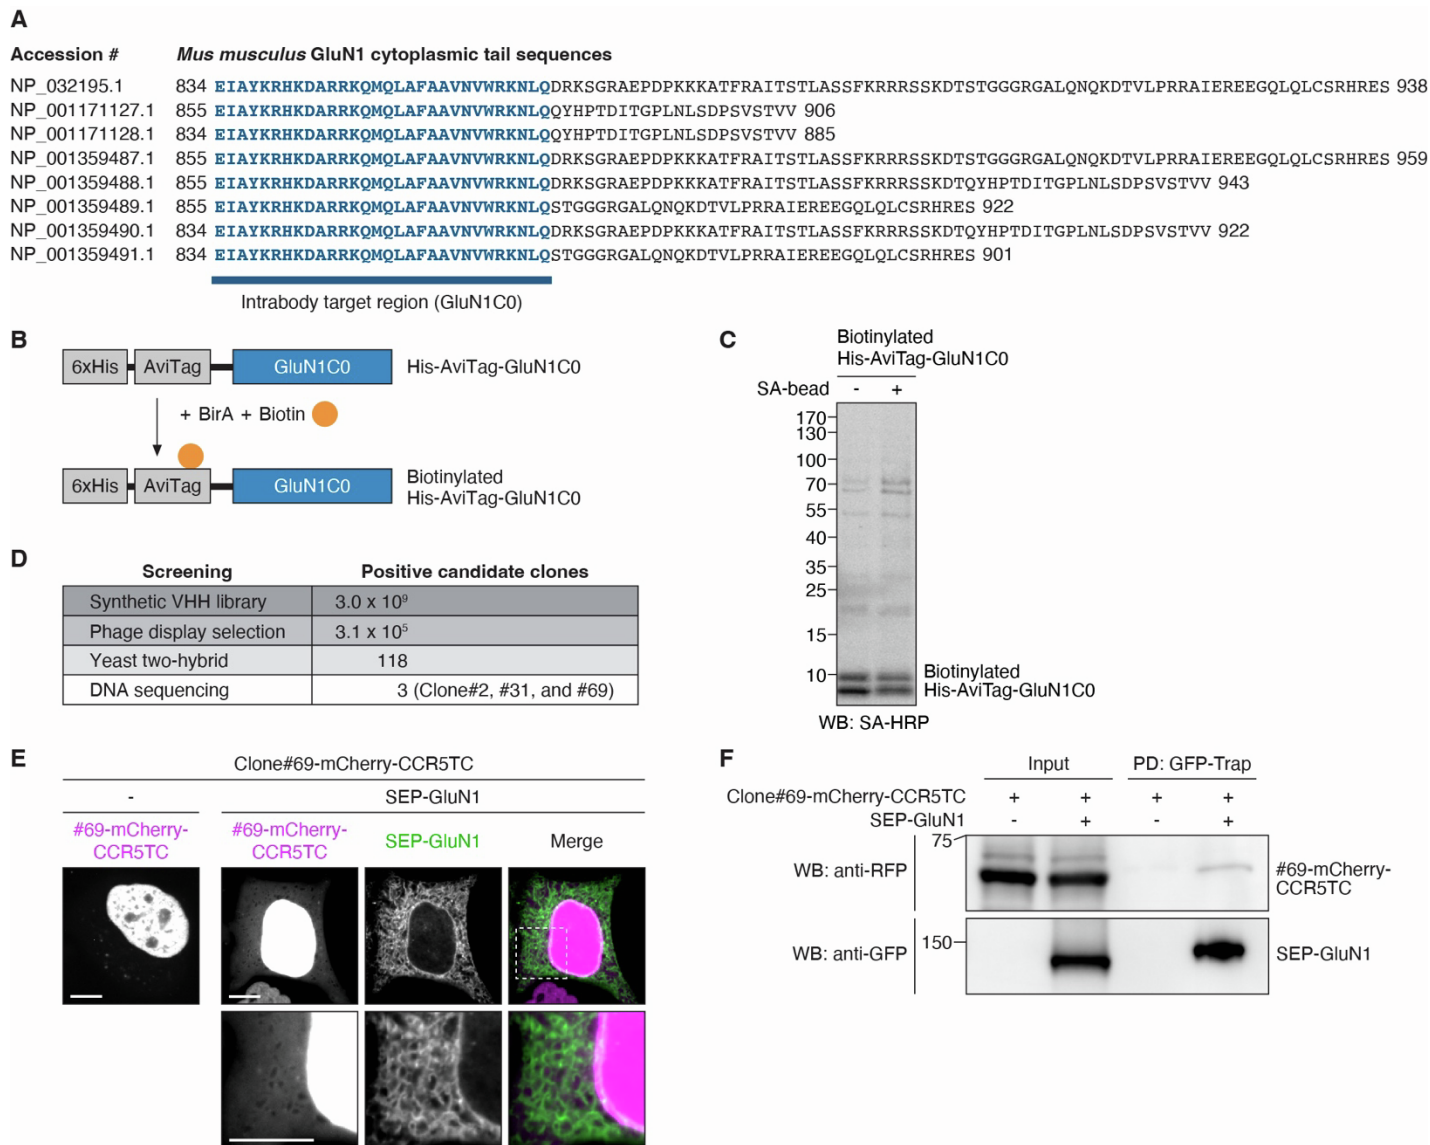

**Figure S1. Screening and validation of anti-GluN1 intrabody candidates, Related to Figure 1 (A)**

Comparison of eight splice variants of mouse GluN1 cytoplasmic tail sequences. The conserved region (834–863 amino acids of NP\_032195.1; C0 cassette) was chosen as the intrabody target (indicated in blue). (B and C) The bacterially purified His-AviTag-tagged GluN1C0 fragment (~11 kDa) was biotinylated by a BirA enzyme *in vitro* (B) and immobilized on streptavidin beads (SA-bead) (C). *In vitro* biotinylation of His-AviTag-GluN1C0 fragment (C, left lane) and immobilization on SA-beads (C, right lane) were confirmed by Western blot using streptavidin-horseradish peroxidase conjugates (SA-HRP). (D) Summary of positive clone numbers of anti-GluN1 intrabody candidates after each screening. (E and F) Colocalization and interaction tests of Clone#69 with GluN1 in heterologous cells. Single transfection of DNA constructs encoding mCherry- and CCR5TC-fused Clone#69 in HeLa cells showed its nuclear localization due to the CCR5TC (E, left panel). Co-expression of SEP-GluN1 (green) showed minimal colocalization of Clone#69 (magenta; E, right panel). GFP-Trap pull-down (PD) showed that Clone#69-mCherry-CCR5TC can bind to SEP-GluN1 in HeLa cells (F). However, Clone#69 was not selected as the anti-GluN1 intrabody because it did not show robust colocalization with SEP-GluN1 (E). Scale bars, 10  $\mu$ m.

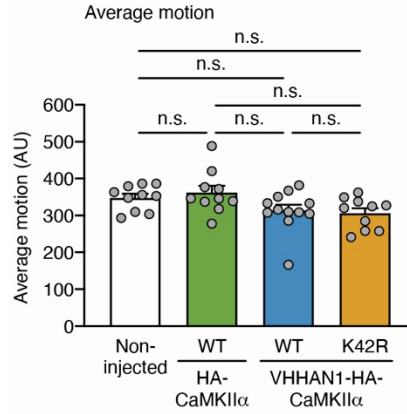

**Figure S2. General locomotor activity, Related to Figure 4** There were no significant differences in average motion (AU, arbitrary unit) measured during the habituation session. Data are shown as mean  $\pm$  SEM;  $n = 10-12$  mice per group; n.s., not significant ( $P = 0.4759$  for non-injected vs. VHHAN1-HA-CaMKII $\alpha$  [wild-type, WT];  $P = 0.2069$  for non-injected vs. VHHAN1-HA-CaMKII $\alpha$  [K42R];  $P = 0.4028$  for HA-CaMKII $\alpha$  vs. VHHAN1-HA-CaMKII $\alpha$  [WT];  $P = 0.1723$  for HA-CaMKII $\alpha$  vs. VHHAN1-HA-CaMKII $\alpha$  [K42R];  $P > 0.9999$  for the rest); Kruskal-Wallis tests with multiple comparisons.

**Table S1.** Synthetic DNAs used in this work, Related to STAR Methods.

|                                                                                                                                                                                                                                                                                                                                                                                                                                                                                                                                                                                                                                                                                                                                                                                                                                                                                                                                                                                                                                                                                                                                                                                                                                                                                                                                                                                                                                                                                                                                                                                                                                                                                                                                                                                                                                                                                                                                                                                                                                                                                                                                                                                                                                                                                                                                                                                                                                                                                                                                                                                                                                                                                                     |
|-----------------------------------------------------------------------------------------------------------------------------------------------------------------------------------------------------------------------------------------------------------------------------------------------------------------------------------------------------------------------------------------------------------------------------------------------------------------------------------------------------------------------------------------------------------------------------------------------------------------------------------------------------------------------------------------------------------------------------------------------------------------------------------------------------------------------------------------------------------------------------------------------------------------------------------------------------------------------------------------------------------------------------------------------------------------------------------------------------------------------------------------------------------------------------------------------------------------------------------------------------------------------------------------------------------------------------------------------------------------------------------------------------------------------------------------------------------------------------------------------------------------------------------------------------------------------------------------------------------------------------------------------------------------------------------------------------------------------------------------------------------------------------------------------------------------------------------------------------------------------------------------------------------------------------------------------------------------------------------------------------------------------------------------------------------------------------------------------------------------------------------------------------------------------------------------------------------------------------------------------------------------------------------------------------------------------------------------------------------------------------------------------------------------------------------------------------------------------------------------------------------------------------------------------------------------------------------------------------------------------------------------------------------------------------------------------------|
| <p><b>AviTag-GluN1(834-863):</b> 5'-GCACAC<b>ATATGGGT</b>CTGAACGACATCTTCGAGGCTCAGAA<br/>AATCGAATGGCACGAAGGTGGAAGTGGATCTGGTGAGATCGCCTACAAGCGACACAAGGATGCC<br/>CGTAGGAAGCAGATGCAGCTGGCTTTTGCAGCCGTGAACGTGTGGAGGAAGAACCTGCAGTGAC<br/><b>TCGAGT</b>TGTGC-3'</p> <p>(NdeI and XhoI are in bold)</p>                                                                                                                                                                                                                                                                                                                                                                                                                                                                                                                                                                                                                                                                                                                                                                                                                                                                                                                                                                                                                                                                                                                                                                                                                                                                                                                                                                                                                                                                                                                                                                                                                                                                                                                                                                                                                                                                                                                                                                                                                                                                                                                                                                                                                                                                                                                                                                                                      |
| <p><b>mCherry-IRES-Cre:</b> 5'-CGCG<b>GATCC</b>GTGAGCAAGGGCGAGGAGGATAACATGGCCATC<br/>ATCAAGGAGTTCATGCGCTTCAAGGTGCACATGGAGGGCTCCGTGAACGGCCACGAGTTCGAGA<br/>TCGAGGGCGAGGGCGAGGGCCGCCCTACGAGGGCACCCAGACCGCCAAGCTGAAGGTGACCA<br/>AGGGTGGCCCCCTGCCCTTCGCCTGGGACATCCTGTCCCTCAGTTCATGTACGGCTCCAAGGC<br/>CTACGTGAAGCACCCCGCGACATCCCCGACTACTTGAAGCTGTCTTCCCGAGGGGTTCAAGT<br/>GGGAGCGCGTGATGAACTTCGAGGACGGCGGCGTGGTGACCGTGACCCAGGACTCCTCCCTGC<br/>AGGACGGCGAGTTCATCTACAAGGTGAAGCTGCGCGGCACCAACTTCCCTCCGACGGCCCCGT<br/>AATGCAGAAGAAGACCATGGGCTGGGAGGCCTCCTCCGAGCGGATGTACCCCGAGGACGGCGC<br/>CCTGAAGGGCGAGATCAAGCAGAGGCTGAAGCTGAAGGACGGCGGCCACTACGACGCTGAGGT<br/>CAAGACCACCTACAAGGCCAAGAAGCCCGTGCAGCTGCCCGGCGCCTACAACGTCAACATCAAG<br/>TTGGACATCACCTCCACAACGAGGACTACCCATCGTGGAACAGTACGAACGCGCCGAGGGCC<br/>GCCACTCCACCGGCGGCATGGACGAGCTGTACAAGTAAGGCGCGCCCCCCTAACGTTACTGG<br/>CCGAAGCCGCTTGAATAAGGCCGGTGTGCGTTTGTCTATATGTTATTTTCCACCATATTGCCGT<br/>TTTTGGCAATGTGAGGGCCCGGAAACCTGGCCCTGTCTTCTTGACGAGCATTCTAGGGGTCTTT<br/>CCCCTCTCGCCAAAGGAATGCAAGGTCTGTTGAATGTCGTGAAGGAAGCAGTTCCTCTGGAAGCT<br/>TCTTGAAGACAAACAACGTCTGTAGCGACCCTTTCAGGCAGCGGAACCCCCACCTGGCGACA<br/>GGTGCTCTGCGGCCAAAAGCCACGTGTATAAGATACACCTGCAAAGGCGGCACAACCCAGTG<br/>CCACGTTGTGAGTTGATAGTTGTGGAAAGAGTCAAATGGCTCTCCTCAAGCGTATTCAACAAGG<br/>GGCTGAAGGATGCCAGAAGGTACCCATTGTATGGGATCTGATCTGGGGCTCGGTGCACATG<br/>CTTTACATGTGTTTAGTCGAGGTTAAAAAACGTCTAGGCCCCCCGAACCACGGGGACGTGGTTT<br/>TCTTTGAAAAACACGATGATAATATGGCCACAACCATGCCAAGAAGAAGAGGAAGGTGTCCAA<br/>TCTCCTGACTGTTCAACCAGAACCTCCCTGCGCTGCCAGTAGATGCCACTAGCGATGAGGTCAGGA<br/>AAAATCTCATGGATATGTTTAGGGATAGACAGGCGTTTTCTGAACACACCTGAAAATGCTGCTTA<br/>GCGTGTGCCGATCCTGGGCAGCCTGGTGTAAAGCTGAACAATCGAAATGGTTCCCCGCCGAGCC<br/>GGAGGACGTGCGGATTACCTGCTGTATCTCCAGGCAAGAGGGCTGGCTGTCAAGACTATCCAG<br/>CAGCACTTGGGCCAACTGAATATGCTGCATCGACGCAGCGGGCTCCCCGGCCTAGCGATTCAA<br/>ACGCAGTCTCCCTTGTATGAGGAGAATTAGAAAGGAAAACGTAGATGCGGGTGAGAGGGCTAAG<br/>CAGGCTCTCGCTTTTGTAGCGGACTGATTTGACCCAGGTCAGATCCCTGATGGAGAACAGCGATCG<br/>GTGCCAGGACATCAGGAACCTCGCATTCTGGGAATTGCATATAACACACTTCTGCGCATAGCTG<br/>AGATCGCCCGGATCAGAGTGAAAGACATCAGTCCAACGGACGGCGGCCGGATGCTTATTCATATT<br/>GGACGCACAAAGACATTGGTCAACCCGCTGGCGTTGAAAAGGCCTTGTCCCTGGGCGTAACGA<br/>AGCTGGTGAAAAGATGGATCTCAGTGTCCGGCGTGGCTGACGACCCTAATAATTACTTGTCTGT<br/>CGAGTGAGAAAAAACGGAGTCGCCGCGCCCTCTGCCACCAGCCAATTGAGTACACGGGCCCTTG<br/>AAGGGATCTTTGAGGCAACCCACCGACTCATATACGGAGCCAAGGATGACAGTGGCCAGAGGTA<br/>TCTCGCCTGGTCAAGTCACTTCTGCTAGGGTGGGGGCCGACGAGACATGGCGCGGGCAGGAGT<br/>CTCCATAACAGAGATTATGCAAGCTGGAGGTTGGACAAATGTGAACATCGTTATGAACTATATCCG<br/>CAATCTTACTCTGAAACCGGGGCCATGGTGAGACTGCTCGAAGATGGTACT<b>GAATTC</b>CGG-3'</p> <p>(BamHI and EcoRI are in bold)</p> |
| <p><b>HA-CaMKII<math>\alpha</math> (wild-type):</b> 5'-<br/>GCATAG<b>GATCC</b>GGTGGTACCCTTATGATGTGCCTGATTATGCTG<br/>GCGGCGGTAGCATGGCTACCATCACCTGCACCCGATTCACGGAAGAGTACCAGCTCTTCGAGGA<br/>ACTGGGAAAGGGAGCCTTCTCCGTGGTGCGCAGGTGTGTGAAGGTGCTGGCTGGCCAGGAGTAT<br/>GCTGCCAAGATTATCAACACCAAGAAGCTCTCAGCCAGAGATCACCAGAAGTTGGAACGCGAGGC<br/>CCGATCTGCCGCTTGTGAAGCACCCCAATATCGTCCGACTCCATGACAGCATCTCCGAGGAGG<br/>GGCACCACCTTATCTTCGATCTGGTCACTGGTGGGGAGCTGTTTGAAGACATTGTGGCCCGG<br/>GAGTATTACAGTGAGGCTGATGCCAGCCACTGTATCCAGCAGATCCTGGAGGCTGTGCTACACTG</p>                                                                                                                                                                                                                                                                                                                                                                                                                                                                                                                                                                                                                                                                                                                                                                                                                                                                                                                                                                                                                                                                                                                                                                                                                                                                                                                                                                                                                                                                                                                                                                                                                                                                                                                                                                                                                                                                                                                                                                                                                                                                                                                                                    |

TCACCAGATGGGGGTGGTGCATCGCGACCTGAAGCCTGAGAATCTGTTGCTGGCTTCGAAGCTC  
AAGGGTGTGCGGTGAAGCTGGCAGACTTTGGCCTGGCCATAGAGGTTGAGGGAGAGCAGCAG  
GCATGGTTTGGTTTCGCAGGGACACCTGGATACCTCTCCCCAGAAGTGCTGCGGAAGGACCCAT  
ACGGGAAGCCTGTGGACCTGTGGGCCTGTGGCGTCATCCTGTATATCTTGCTGGTTGGGTATCCC  
CCATTCTGGGATGAGGACCAGCACCGCCTGTACCAGCAGATCAAAGCTGGTGCCTACGATTTCCC  
ATCACCAGAATGGGACACCGTCACCCCGGAAGCCAAGGATCTGATCAATAAGATGCTGACCATCA  
ACCCGTCCAAACGCATCACGGCCGCTGAGGCTCTCAAGCACCCCTGGATCTCGCACCGCTCCAC  
TGTGGCCTCCTGCATGCACAGACAGGAGACCGTGGACTGCCTGAAGAAGTTCAATGCCAGGAGG  
AAACTGAAGGGAGCCATCCTCACCCTATGCTGGCCACCAGGAACCTTCTCCGGAGGGAAGAGTG  
GAGGAAACAAGAAGAATGATGGCGTGAAGGAATCCTCTGAGAGCACCAACACCACCATCGAGGA  
TGAAGACACCAAAGTGCGCAAACAGGAAATTATCAAAGTGACAGAGCAGCTGATCGAAGCCATAA  
GCAATGGAGACTTTGAATCCTACACGAAGATGTGCGACCCTGGAATGACAGCCTTTGAACCGGAG  
GCCCTGGGGAACCTGGTCGAGGGCCTGGACTTTTCATCGATTCTATTTTGA AACCTGTGGTCCCG  
GAACAGCAAGCCCGTGCACACCACCATCCTGAACCCTCACATCCACCTGATGGGTGACGAGTCA  
GCCTGCATCGCCTACATCCGCATCACTCAGTACCTGGATGCGGGTGGCATCCCCCGCACGGCCC  
AGTCAGAGGAGACCCGTGTCTGGCACCGCAGGGATGGAAAATGGCAGATCGTCCACTTCCACAG  
ATCTGGGGCGCCCTCCGTCTGCCCCATTGAG**GGCGCGCC**TAGTC-3'

(BamHI and Ascl are in bold)

**HA-CaMKII $\alpha$  (K42R):** 5'-

GCATAG**GGATCC**GGTGGTGGCTACCCTTATGATGTGCCTGATTATGCTGGCGGGCGGTAGCATGGC  
TACCATCACCTGCACCCGATTCACGGAAGAGTACCAGCTCTTCGAGGAACTGGGAAAGGGAGCCT  
TCTCCGTGGTGCAGGTGTGTGAAGGTGCTGGCTGGCCAGGAGTATGCTGCCCGGATTATCAA  
CACCAAGAAGCTCTCAGCCAGAGATCACCAGAAGTTGGAACGCGAGGCCCGCATCTGCCGCTTG  
TTGAAGCACCCCAATATCGTCCGACTCCATGACAGCATCTCCGAGGAGGGGGCACCCTACCTTAT  
CTTCGATCTGGTCACTGGTGGGGAGCTGTTCAAGACATTGTGGCCCCGGGAGTATTACAGTGAG  
GCTGATGCCAGCCACTGTATCCAGCAGATCCTGGAGGCTGTGCTACACTGTCACCAGATGGGGG  
TGGTGCATCGCGACCTGAAGCCTGAGAATCTGTTGCTGGCTTCAAGCTCAAGGGTGTGCGGT  
GAAGCTGGCAGACTTTGGCCTGGCCATAGAGGTTGAGGGAGAGCAGCAGGCATGGTTTGGGTTT  
GCAGGGACACCTGGATACCTCTCCCCAGAAGTGCTGCGGAAGGACCCATACGGGAAGCCTGTGG  
ACCTGTGGGCCTGTGGCGTCATCCTGTATATCTTGCTGGTTGGGTATCCCCATTCTGGGATGAG  
GACCAGCACCGCCTGTACCAGCAGATCAAAGCTGGTGCCTACGATTTCCCATCACCAGAATGGGA  
CACCGTCACCCCGGAAGCCAAGGATCTGATCAATAAGATGCTGACCATCAACCCGTCCAAACGCA  
TCACGGCCGCTGAGGCTCTCAAGCACCCCTGGATCTCGCACCGCTCCACTGTGGCCTCCTGCAT  
GCACAGACAGGAGACCGTGGACTGCCTGAAGAAGTTCAATGCCAGGAGGAAACTGAAGGGAGCC  
ATCCTCACCCTATGCTGGCCACCAGGAACCTTCTCCGGAGGGAAGAGTGGAGGAAACAAGAAGA  
ATGATGGCGTGAAGGAATCCTCTGAGAGCACCAACACCACCATCGAGGATGAAGACACCAAAGTG  
CGAAACAGGAAATTATCAAAGTGACAGAGCAGCTGATCGAAGCCATAAGCAATGGAGACTTTGA  
ATCCTACACGAAGATGTGCGACCCTGGAATGACAGCCTTTGAACCGGAGGCCCTGGGGAACCTG  
GTCGAGGGCCTGGACTTTTCATCGATTCTATTTTGA AACCTGTGGTCCCGGAACAGCAAGCCCGT  
GCACACCACCATCCTGAACCCTCACATCCACCTGATGGGTGACGAGTCAGCCTGCATCGCCTACA  
TCCGCATCACTCAGTACCTGGATGCGGGTGGCATCCCCCGCACGGCCAGTCAGAGGAGACCCG  
TGTCTGGCACCGCAGGGATGGAAAATGGCAGATCGTCCACTTCCACAGATCTGGGGCGCCCTCC  
GTCCTGCCCCATTGAG**GGCGCGCC**TAGTC-3'

(BamHI and Ascl are in bold; CGG encoding R42 is underlined)

**Kozak consensus sequence:** 5'-CTAGCGGTACCGCCACCATGGGATC-3'

(Kozak is in bold; overhangs are underlined)

**Table S2.** Primers used for plasmid construction, Related to STAR Methods.

| <b>Construct</b>                    | <b>Primer</b> |                                                                                       |
|-------------------------------------|---------------|---------------------------------------------------------------------------------------|
| pCAG-Clone#2/#31/#69-mCherry-CCR5TC | Fwd#1         | 5'-GCACAG <b>GTACCGCC</b> ACCATGGCGGAAGT-3'<br>(KpnI in bold)                         |
|                                     | Rev#1         | 5'-GCCAGCTCCCCTAGACTTGTACAGCTCGTCC-3'                                                 |
|                                     | Fwd#2         | 5'-GGACGAGCTGTACAAGTCTAGGGGAGCTGGC-3'                                                 |
|                                     | Rev#2         | 5'-GCACA <b>ACGCGT</b> TTAAGCCATAGAAGCAAGATTAG<br>AATAATTTTCAAGC-3'<br>(MluI in bold) |
| pENTR-VHHAN1-EGFP-CCR5TC            | Fwd           | 5'-GCACA <b>AAGCTT</b> GCCACCATGGCGGAAGTGCAGCTG-3'<br>(HindIII in bold)               |
|                                     | Rev           | 5'-GCACAG <b>GATCCG</b> CTACTCACAGTTACCTGCGTC-3'<br>(BamHI in bold)                   |
